# Supplementary material for: Involvement of Orai1 in tunicamycin-induced endothelial dysfunction
Source: PubMed Central journal article supplement — Korean J Physiol Pharmacol. 2019 Feb 15;23(2):95–102. doi: 10.4196/kjpp.2019.23.2.95 (PMC6384200; doi:10.4196/kjpp.2019.23.2.95), 2019-02-15
Supplement: kjpp-23-95-s001.pdf [file kjpp-23-95-s001.pdf]

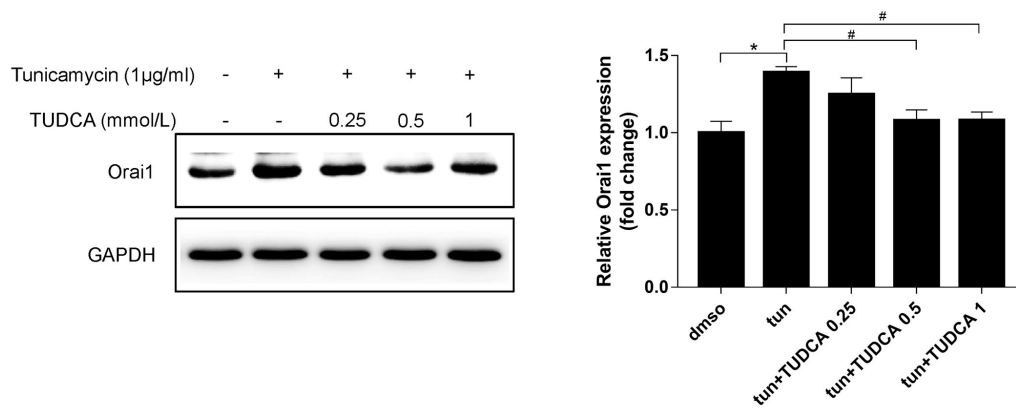

**Supplementary Fig. 1. Effect of the ER stress inhibitor TUDCA on tunicamycin-induced Orai1 expression.** HUVECs were preincubated with 0.25, 0.5, 1 mM TUDCA before treatment with 1 µg/ml tunicamycin for 24 h. Orai1 expression was assayed by western blotting. \* $p < 0.05$  vs. control; # $p < 0.05$  vs. tunicamycin treatment only,  $n = 4$ .
