# Supplementary material for: Involvement of Orai1 in tunicamycin-induced endothelial dysfunction
Source: PubMed Central journal article supplement — Korean J Physiol Pharmacol. 2019 Feb 15;23(2):95–102. doi: 10.4196/kjpp.2019.23.2.95 (PMC6384200; doi:10.4196/kjpp.2019.23.2.95), 2019-02-15
Supplement: kjpp-23-95-s002.pdf [file kjpp-23-95-s002.pdf]

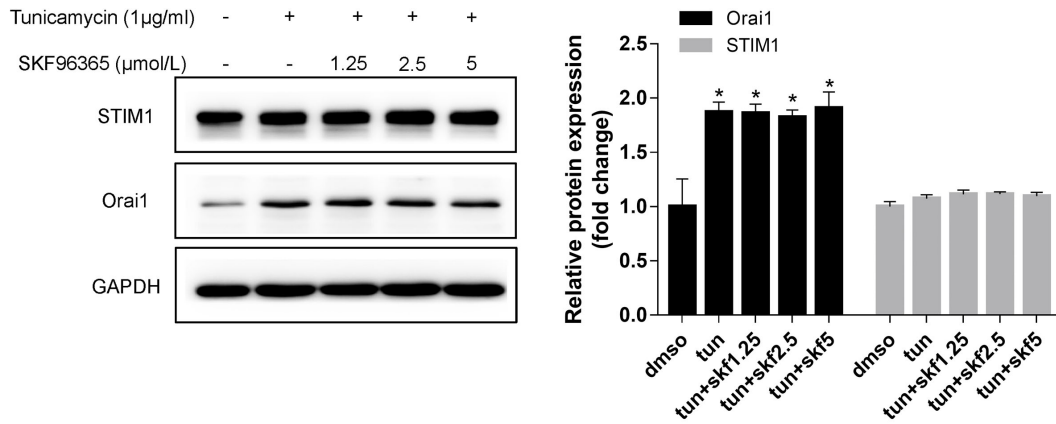

**Supplementary Fig. 2. Effect of the SOCE inhibitor SKF96365 on tunicamycin-induced Orai1 and STIM1 expression.** HUVECs were preincubated with 1.25, 2.5, or 5 µM SKF96365 before treatment with 1 µg/ml tunicamycin for 24 h. Orai1 and STIM1 expression were assayed by western blotting. \*p < 0.05 vs. control, n = 4.
